# Supplementary material
Source: PubMed Central journal article supplement (PMC3044464)
Supplement: NIHMS33736-supplement-Table_S1.pdf [file NIHMS33736-supplement-Table_S1.pdf]

**Table S1. Quantification of effect of MOs, mutants and drug treatments**

| Figure number and panel | Assay                                                     | Genotype/Treatment and quantification of phenotype |                                                        |                                                                                                                   |                                                                                |                                                                           |                                                                           |
|-------------------------|-----------------------------------------------------------|----------------------------------------------------|--------------------------------------------------------|-------------------------------------------------------------------------------------------------------------------|--------------------------------------------------------------------------------|---------------------------------------------------------------------------|---------------------------------------------------------------------------|
|                         |                                                           | <i>smo</i> <sup>+/-</sup> incross                  | <i>shha</i> <sup>+/-</sup> incross                     |                                                                                                                   |                                                                                |                                                                           |                                                                           |
| Fig. 1A left            | MyHC IHC, 10s<br><i>myod</i> ISH<br><i>hsp90α</i> ISH, 5s | a14/50 [28%]<br>r16/50 [32%]                       | r9/41 [22%]<br>r13/50 [26%]                            |                                                                                                                   |                                                                                |                                                                           |                                                                           |
| Fig. 1A right           | <i>myf5</i> ISH, 6s<br><i>myod</i> ISH, 6s                | r28/90 [31%]<br>r33/100 [33%]                      | r22/90 [24%]<br>r27/100 [27%]                          |                                                                                                                   |                                                                                |                                                                           |                                                                           |
| Fig. 1B                 | <i>myog</i> ISH, 5s                                       | a10/42 [24%]                                       | r14/66 [21%]                                           |                                                                                                                   |                                                                                |                                                                           |                                                                           |
| Fig. 1C                 | Myod IHC, 6s                                              | n56/56 (wt) [100%]                                 | a105/105 [100%] (in adaxial cells)                     | <i>smo</i> <sup>+/-</sup> incross<br>a39/145 [27%] (in adaxial cells)                                             | <i>shha</i> <sup>+/-</sup> incross<br>r55/226 [24%] (in adaxial cells)]        |                                                                           |                                                                           |
| Fig. 2A                 | <i>myog</i> ISH, 5s                                       | n20/20 [100%]                                      | a46/55 [84%]<br>r9/55 [16%]                            |                                                                                                                   |                                                                                |                                                                           |                                                                           |
| Fig. 2B left            | <i>myog</i> ISH, MyHC IHC 5s                              | n20/20 n[100%]                                     | a46/60 [77%]<br>r14/60 [23%]                           |                                                                                                                   |                                                                                |                                                                           |                                                                           |
| Fig. 2B right           | MyHC IHC<br><i>prdm1</i> ISH                              | n40/40 [100%]                                      | r31/31 [100%] (MyHC)<br>n31/31 [100%] ( <i>prdm1</i> ) |                                                                                                                   |                                                                                |                                                                           |                                                                           |
| Fig. 2C left            | <i>eng2a</i> ISH, 15s<br>slow MyHC IHC                    | n16/21 [76%]<br>n16/21 [76%]                       | n22/28 [79%]<br>n22/28 [79%]                           | <i>sib</i> + <i>myf5</i> MO<br>n22/30 [73%]<br>n22/30 [73%]                                                       | <i>shha</i> <sup>-/-</sup><br>a5/21 [24%]<br>r5/21 [24%]                       | <i>shha</i> <sup>-/-</sup> + <i>myf5</i> MO<br>a6/28 [21%]<br>r6/28 [21%] | <i>shha</i> <sup>-/-</sup> + <i>myod</i> MO<br>a8/30 [27%]<br>a8/30 [27%] |
| Fig. 2C top right       | slow MyHC IHC, 15s                                        | n47/60 [78%]                                       | n36/49 [74%]                                           | <i>shha</i> <sup>-/-</sup><br>r13/60 [22%]                                                                        | <i>shha</i> <sup>-/-</sup> + <i>myog</i> MO<br>a6/49 [12%]<br>w7/49 [14%]      |                                                                           |                                                                           |
| Fig. 2C bottom right    | <i>myod</i> ISH, 10s<br><i>mrf4</i> ISH, 10s              | n41/57 [72%]<br>n41/57 [72%]                       |                                                        |                                                                                                                   | r16/57 [28%]<br>a16/57 [28%]                                                   |                                                                           |                                                                           |
| Fig. 3A left            | <i>cdkn1c</i> , ISH, 5s                                   | n30/30 [100%]                                      | r14/50 [28%]                                           | <i>cyA</i><br>a50/50 [100%]                                                                                       |                                                                                |                                                                           |                                                                           |
| Fig. 3A middle          | <i>cdkn1c</i> ISH, 11s                                    | n30/30 [100%]                                      | a46/46 [100%]                                          | <i>con</i> (wt)<br>ur0/43 [0%]                                                                                    | <i>shh</i> mRNA<br>ur33/37 [89%]                                               |                                                                           |                                                                           |
| Fig. 3A right           | <i>cdkn1c</i> ISH, 24 hpf                                 | n37/50 [74%]                                       | a13/50 [26%]                                           | <i>sib</i><br><i>shha</i> <sup>-/-</sup>                                                                          | <i>sib</i> + <i>cdkn1c</i> MO<br><i>shha</i> <sup>-/-</sup> + <i>cdkn1c</i> MO |                                                                           |                                                                           |
| Fig. 3B                 | <i>myog</i> , ISH, 5s                                     | n26/37 [70%]                                       | r11/37 [30%]                                           | <i>con</i> ( <i>shha</i> <sup>-/-</sup> )<br>r12/22 [55%]<br>n2/22 [9%]                                           | <i>shha</i> <sup>-/-</sup> + <i>cdkn1c</i> MO<br>a8/22 [36%]                   |                                                                           |                                                                           |
| Fig. 3C top             | Myod IHC, 8s                                              | r0/86 [0%]                                         | r93/106 [88%]                                          |                                                                                                                   |                                                                                |                                                                           |                                                                           |
| Fig. 3C bottom          | MyHC IHC 15s                                              | r0/15 [0%]                                         | r10/17 [59%]                                           |                                                                                                                   |                                                                                |                                                                           |                                                                           |
| Fig. 3D                 | Myod, IHC, TB                                             | r0/50 [100%]                                       | r55/62 [89%]                                           |                                                                                                                   |                                                                                |                                                                           |                                                                           |
| Fig. 4A                 | <i>cdkn1c</i> ISH, 12s                                    | n50/50 [100%]                                      | r14/60 [23%]<br>wr46/60 [77%]                          | <i>con</i> ( <i>myf5</i> <sup>hu2022/+</sup> incross)<br><i>myf5</i> <sup>hu2022/+</sup> incross + <i>myod</i> MO |                                                                                |                                                                           |                                                                           |
| Fig. 4B                 | <i>cdkn1c</i> ISH, 15s                                    | n30/30 [100%]                                      | r41/42 [98%]<br>n1/42 [2%]                             | <i>con</i> (wt)<br><i>myf5</i> MO                                                                                 | <i>myf5</i> <sup>hu2022/+</sup> incross<br>n50/50 [100%]                       |                                                                           |                                                                           |

|                      |                                       |                                                                     |                                                                    |                                                                      |                                                                      |                                                                                             |                                                                                                              |                                                                       |                                                                                             |
|----------------------|---------------------------------------|---------------------------------------------------------------------|--------------------------------------------------------------------|----------------------------------------------------------------------|----------------------------------------------------------------------|---------------------------------------------------------------------------------------------|--------------------------------------------------------------------------------------------------------------|-----------------------------------------------------------------------|---------------------------------------------------------------------------------------------|
| Fig. 4C              | <i>cdkn1c</i> ISH, 24 hpf             | con (wt)<br>n30/30 [100%]                                           | <i>myf5</i> MO + <i>myod</i> MO<br>r59/60 [98%]<br>n1/60 [2%]      |                                                                      |                                                                      |                                                                                             |                                                                                                              |                                                                       |                                                                                             |
| Fig. 4D              | <i>cdkn1c</i> ISH, 15s                | con (wt)<br>n26/26 [100%]                                           | wt + <i>shh</i> RNA<br>e22/23 [96%]<br>n1/23 [4%]                  | <i>myod</i> MO                                                       | <i>myod</i> MO + <i>shh</i> RNA<br>e41/43 [95%]<br>n2/43 [5%]        | <i>myf5</i> MO + <i>myod</i> MO<br>r36/38 [95%]<br>n2/38 [5%]                               | <i>myf5</i> MO + <i>myod</i> MO + <i>shh</i> RNA<br>er51/63 [81%]<br>e2/63 [3%]<br>r7/63 [11%]<br>n3/63 [5%] |                                                                       |                                                                                             |
| Fig. 4E              | <i>smyhc1</i> ISH, 24 hpf             | n48/48 [100%]                                                       | ur37/43 [86%]<br>n6/43 [14%]                                       | wr13/13 [100%]                                                       | ur11/11 [100%]                                                       | r54/59 [91%]<br>wr1/59 [2%]<br>n4/59 [7%]                                                   | r44/52 [85%]<br>ur6/52 [11%]<br>n2/52 [4%]                                                                   |                                                                       |                                                                                             |
| Fig. 5A              | slow MyHC IHC, 24hpf                  | con ( <i>smo</i> <sup>-/-</sup> )<br>171/12                         | <i>smo</i> <sup>-/-</sup> + <i>cdkn1</i> DNA                       | con (wt + <i>cyA</i> )                                               | <i>cyA</i> + <i>myod</i> MO                                          | <i>cyA</i> + <i>cdkn1</i> DNA                                                               | <i>cyA</i> + <i>myod</i> MO + <i>cdkn1</i> DNA                                                               | <i>smo</i> <sup>-/-</sup> + <i>cdkn1</i> MO<br>82/22                  |                                                                                             |
| Fig. 5B              | slow MyHC and GFP IHC, 18som          | 15/3                                                                | 114/4                                                              |                                                                      |                                                                      |                                                                                             |                                                                                                              |                                                                       |                                                                                             |
| Fig. 5C bottom left  | MyHC IHC, 12som                       | 17/38                                                               | 158/40                                                             | 69/135                                                               | 0/70                                                                 | 195/95                                                                                      | 6/86                                                                                                         |                                                                       |                                                                                             |
| Fig. 5C bottom right | MyHC IHC, 12som                       | 0/38 [0%]                                                           | 23/40 [58%]                                                        | 2/135 [1%]                                                           | 0/70 [0%]                                                            | 65/95 [68%]                                                                                 | 2/86 [2%]                                                                                                    |                                                                       |                                                                                             |
| Fig. 6A              | <i>myhz1</i> ISH, 24 hpf              | <i>myf5</i> <sup>hu2022/+</sup> ( <i>incross</i> )<br>n20/20 [100%] | <i>myf5</i> <sup>hu2022</sup> sib + <i>myod</i> MO<br>r19/25 [20%] | <i>myf5</i> <sup>hu2022</sup> sib + <i>cdkn1c</i> MO<br>r34/41 [83%] | <i>myf5</i> <sup>hu2022</sup> + <i>myod</i> MO<br>sr6/25 [24%]       | <i>myf5</i> <sup>hu2022</sup> <i>myod</i> MO + <i>cdkn1c</i> MO<br>a7/41 [17%]              |                                                                                                              |                                                                       |                                                                                             |
| Fig. 6B              | MyHC IHC, 24 hpf                      | con (wt)<br>n40/40 [100%]                                           | <i>cdkn1c</i> MO<br>w55/60 [92%]<br>n5/60 [8%]                     |                                                                      |                                                                      |                                                                                             |                                                                                                              |                                                                       |                                                                                             |
| Fig. 6C              | Myod, IHC, 24 hpf                     | n10/10 [100%]                                                       | r10/10 [100%]                                                      |                                                                      |                                                                      |                                                                                             |                                                                                                              |                                                                       |                                                                                             |
|                      | Myogenin IHC, 24 hpf                  | n10/10 [100%]                                                       | r7/10 [70%]<br>n3/10 [30%]                                         |                                                                      |                                                                      |                                                                                             |                                                                                                              |                                                                       |                                                                                             |
| Fig. 6D              | <i>mylz2</i> ISH, 3 dpf               | con MO<br>a0/60 [0%]<br>w3/60 [5%]<br>n57/60 [95%]                  | <i>cdkn1c</i> MO (9ng)<br>a19/20 [95%]<br>w1/20 [5%]<br>n0/20 [0%] | <i>myod</i> MO (2ng)<br>a18/20 [90%]<br>w2/20 [10%]<br>n0/20 [0%]    | <i>myod</i> MO (0.5ng)<br>a2/20 [10%]<br>w16/20 [80%]<br>n2/20 [10%] | <i>cdkn1c</i> MO (3ng); <i>myod</i> MO (0.5ng)<br>a15/20 [75%]<br>w5/20 [25%]<br>n0/20 [0%] | <i>cdkn1c</i> MO (3ng)<br>a0/70 [0%]<br>w10/70 [14.2%]<br>n60/70 [85.8%]                                     | <i>myod</i> MO (0.25ng)<br>a7/40 [18%]<br>w7/40 [18%]<br>n26/40 [65%] | <i>cdkn1c</i> MO(3ng) <i>myod</i> MO (0.25ng)<br>a29/50 [58%]<br>w17/50 [34%]<br>n4/50 [8%] |
| Fig. S1 left         | BrdU IHC, 5s<br><i>myod</i> ISH, 5s   | n41/41 [100%]                                                       | n15/15 [100%]                                                      |                                                                      |                                                                      |                                                                                             |                                                                                                              |                                                                       |                                                                                             |
| Fig. S1 right        | BrdU IHC, 5s<br><i>hsp90a</i> ISH, 5s | con (wt)<br>n34/34 [100%]                                           | <i>cdkn1c</i> MO<br>n62/62 [100%]                                  | <i>cyA</i><br>n31/31 [100%]                                          |                                                                      |                                                                                             |                                                                                                              |                                                                       |                                                                                             |
| Fig. S3 left         | <i>myod</i> ISH, 8s                   | con ( <i>shha</i> <sup>-/-</sup> )<br>r0/55 [0%]                    | <i>shha</i> <sup>-/-</sup> + <i>cdkn1c</i> 5' MO<br>r0/66 [0%]     | <i>shha</i> <sup>-/-</sup> + <i>cdkn1c</i> ATG MO<br>r0/39 [0%]      |                                                                      |                                                                                             |                                                                                                              |                                                                       |                                                                                             |
| Fig. S3 right        | <i>myog</i> ISH, 8s                   | r0/66 [0%]                                                          | r19/44 [43%]                                                       |                                                                      |                                                                      |                                                                                             |                                                                                                              |                                                                       |                                                                                             |
| Fig. S5              | MyHC IHC, 15s                         | con (wt)<br>n50/50 [100%]                                           | <i>myod</i> RNA<br>ur29/44 [66%]                                   |                                                                      |                                                                      |                                                                                             |                                                                                                              |                                                                       |                                                                                             |
|                      | <i>myog</i> ISH, 15s                  | n30/30 [100%]                                                       | ur19/22 [86%]                                                      |                                                                      |                                                                      |                                                                                             |                                                                                                              |                                                                       |                                                                                             |
|                      | MyHC IHC, <i>prdm1</i> ISH, 15s       | n50/50 [100%]                                                       | ur35/46 [76%]                                                      |                                                                      |                                                                      |                                                                                             |                                                                                                              |                                                                       |                                                                                             |
|                      | <i>cdkn1c</i> ISH, 15s                | n50/50 [100%]                                                       | ur25/38 [66%]                                                      |                                                                      |                                                                      |                                                                                             |                                                                                                              |                                                                       |                                                                                             |

IHC, immunohistochemistry; ISH, in situ hybridization; n, normal; wr, weakly reduced; r, reduced; sr, strongly reduced; a, ablated; ur up-regulated; wt, wild type.

Fig. 1A left. Fraction of embryos showing reduced (r) or absent (a) accumulation of MyHC or *myod* mRNA in adaxial cells.

Fig. 1A right. Fraction of embryos showing reduced (r) adaxial *myf5* and *myod* mRNAs in a double ISH assay.

Fig. 1B. Fraction of embryos showing reduced (r) or absent (a) expression of *myogenin* mRNA in adaxial cells.

Fig. 1C. Fraction of embryos showing normal (n), reduced (r) or absent (a) accumulation of Myod in adaxial cells.

Fig. 2A. Fraction of embryos showing normal (n), absent (a), or reduced (r) *myogenin* mRNA. A similar fraction is shown in Fig. 2B left, except these embryos were also stained by pan MyHC IHC.

Fig. 2B right. Fraction of embryos with normal (n) or reduced (r) *prdm1* mRNA or MyHC accumulation.

Fig. 2C left. Fraction of embryos showing normal (n), reduced (r) or absent (a) *eng2a* (lacking in *shha*<sup>-/-</sup>) and slow MyHC.

Fig. 2C top right. Fraction of embryos showing normal (n), reduced (r) or absent (a) slow MyHC IHC.

Fig. 2C bottom right. Fraction of embryos showing normal (n), reduced (r), or absent (a) *mrf4* expression or adaxial *myod* accumulation.

Fig. 3A left. Fraction of embryos showing normal (n), reduced (r) or absent (a) *cdkn1c* expression in adaxial cells.

Fig. 3A middle. Fraction of embryos showing normal (n), absent (a) or up-regulated (ur) levels of *cdkn1c* transcript in adaxials.

Fig. 3A right. Fraction of embryos from a *smo*<sup>p641/a</sup> incross showing normal (n) or absent (a) *cdkn1c* mRNA in tail somites.

Fig. 3B. Fraction of embryos showing normal (n), reduced (r) or absent (a) *myogenin* mRNA in adaxial cells.

Fig. 3C top. Fraction of embryos with reduced Myod protein level in adaxial cells.

Fig. 3C bottom. Fraction of embryos with reduced (r) somitic MyHC protein level.

Fig. 3D. Fraction of embryos showing normal (n) or reduced (r) Myod accumulation.

Fig. 4A,B,C. Fraction of embryos showing normal (n), reduced (r) or weakly reduced (wr) *cdkn1c* mRNA.

Fig. 4D. Fraction of embryos in which *cdkn1c* mRNA was normal (n), expanded laterally (e), reduced (r) or expanded laterally in PSM but reduced in the somite area (er).

Fig. 4E. Fraction of embryos showing normal (n), up-regulated (ur), weakly reduced (wr) or reduced (r) *smyhc1* mRNA expression.

Fig. 5A,B,C bottom left. Number of fibres / Number of embryos scored.

Fig. 5C bottom right. Number of rescued embryos / Number of embryos scored.

Fig. 6A. Fraction of embryos showing normal (n), reduced (r), strongly reduced (sr) or absent (a) *myhz1* mRNA.

Fig. 6B. Fraction of embryos showing normal (n) or weak reduction (wr) of pan-MyHC immunoreactivity.

Fig. 6C. Fraction of embryos imaged by confocal microscopy showing normal (n) or reduced (r) Myod or Myogenin immunoreactivity.

Fig. 6D. Fraction of embryos with ablated (a), weak reduction (wr) or normal (n) *mylz2* mRNA in hyoid muscle.

Fig. S1. Fraction of embryos with normal (n) BrdU immunoreactivity, including absence in adaxial cells.

Fig. S3 left. Fraction of embryos with reduced (r) adaxial *myod* mRNA.

Fig. S3 right. Fraction of embryos with reduced (r) adaxial *myogenin* mRNA.

Fig. S5. Fraction of embryos showing normal (n) or up-regulated (ur) levels of MyHC, *myogenin*, *prdm1* or *cdkn1c* mRNA accumulation.
