# Supplementary material
Source: PubMed Central journal article supplement (PMC3044464)

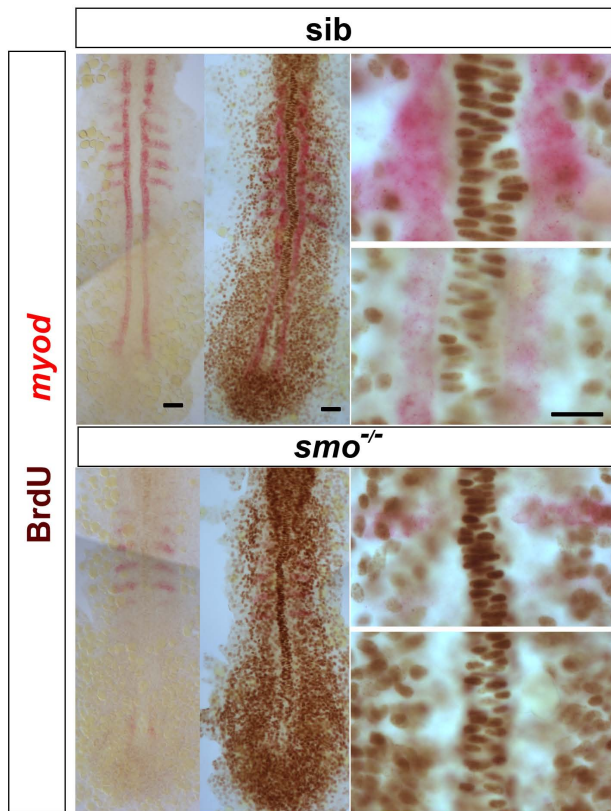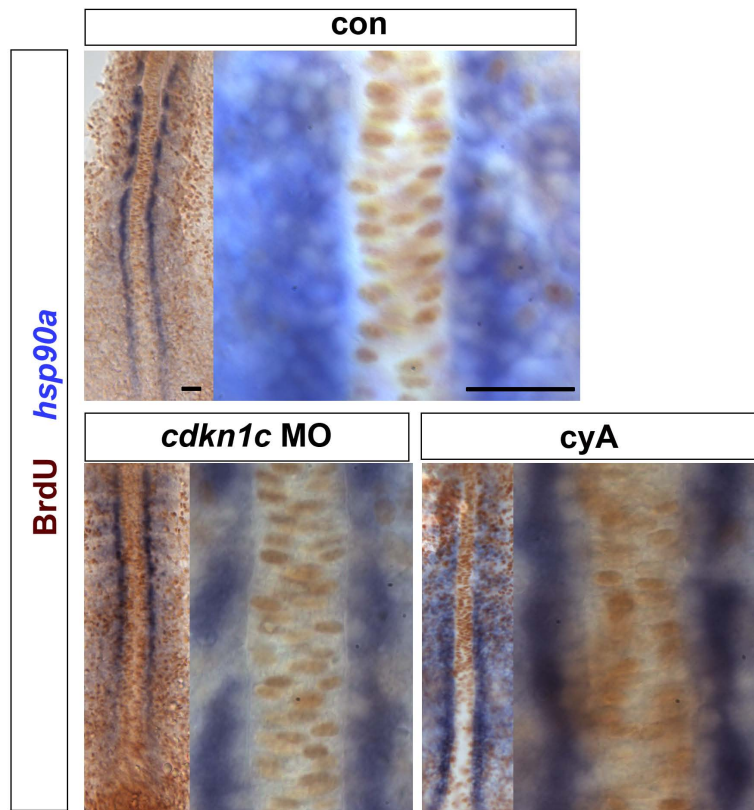

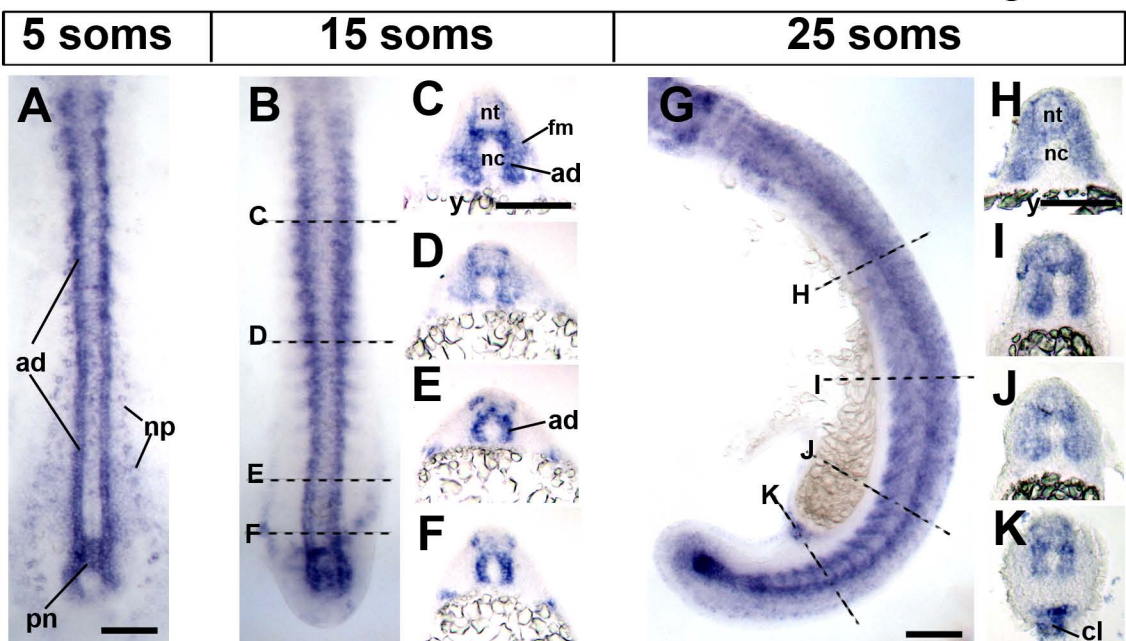

24 hpf

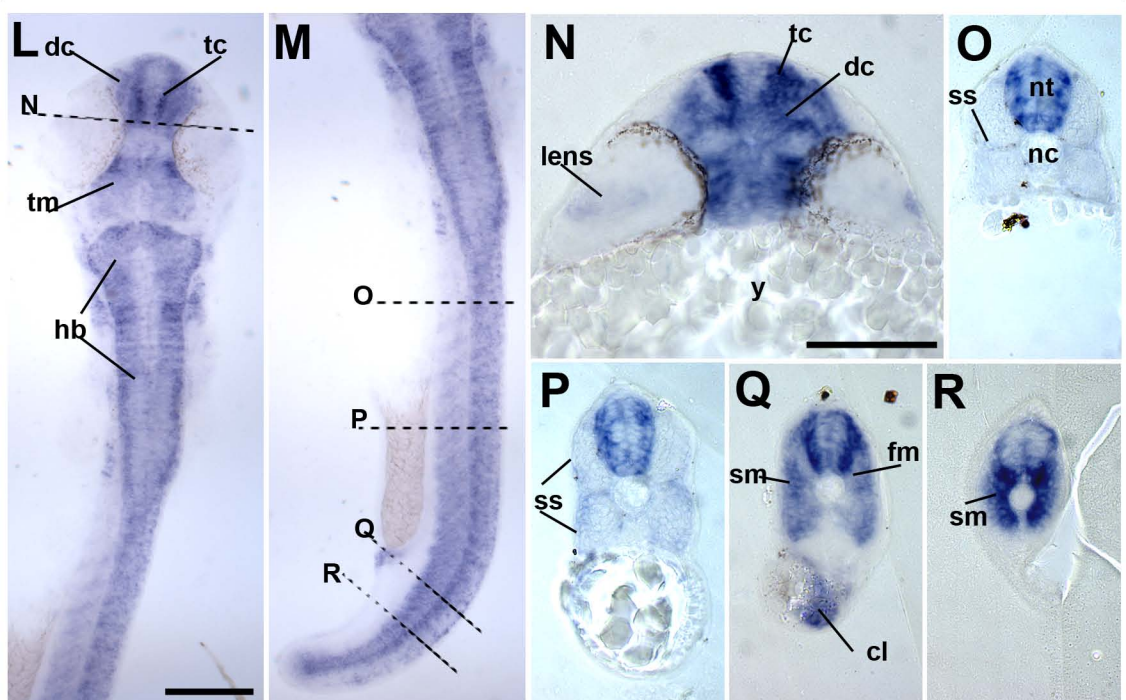

48 hpf

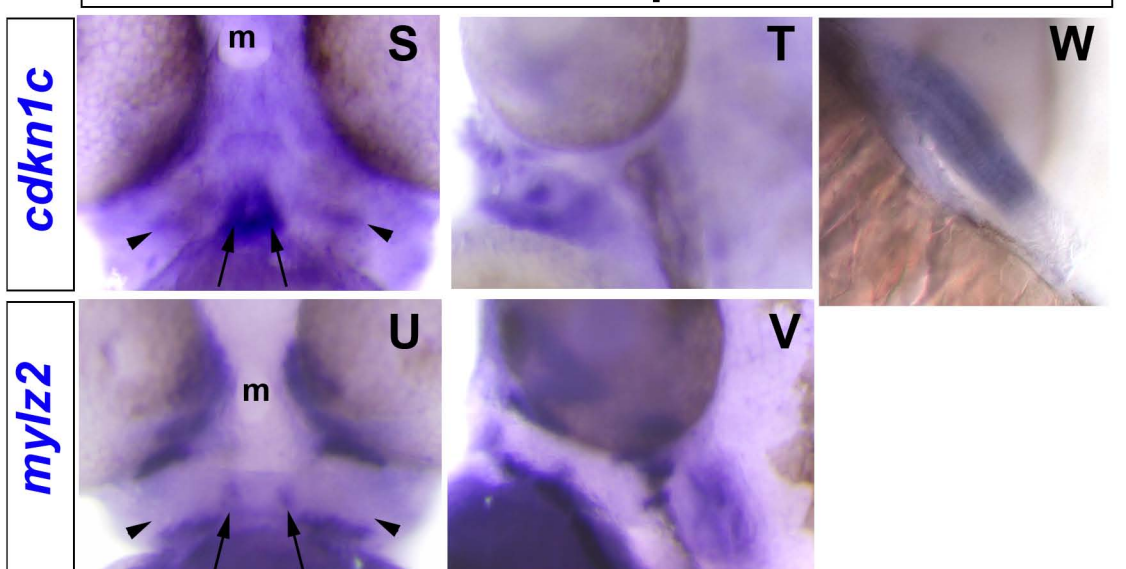

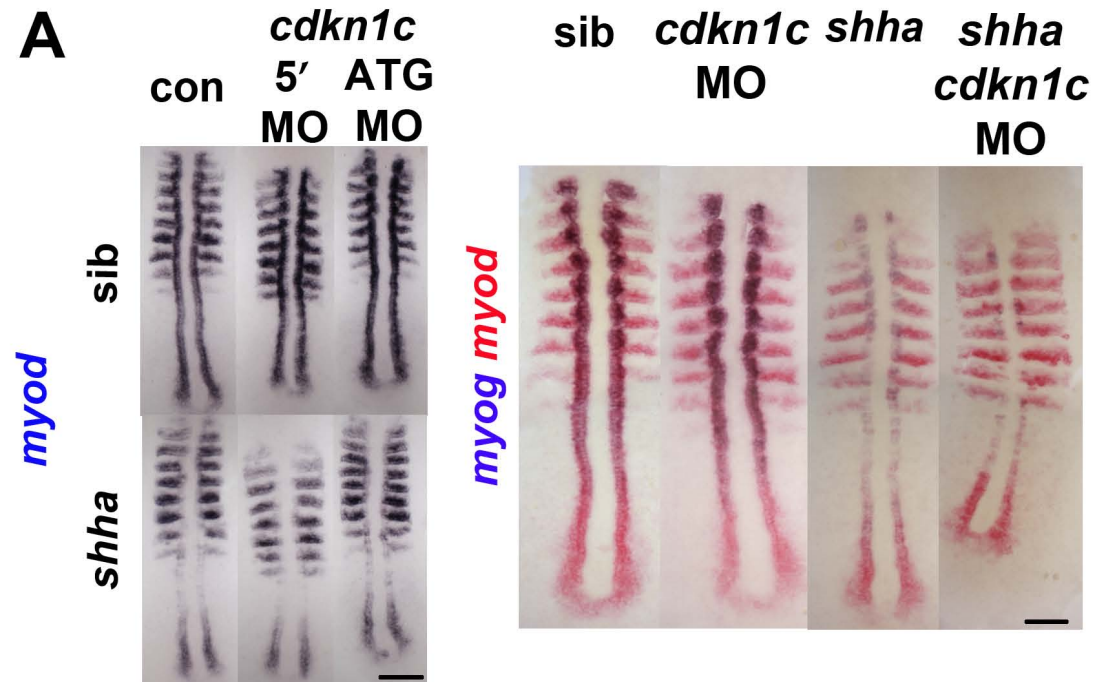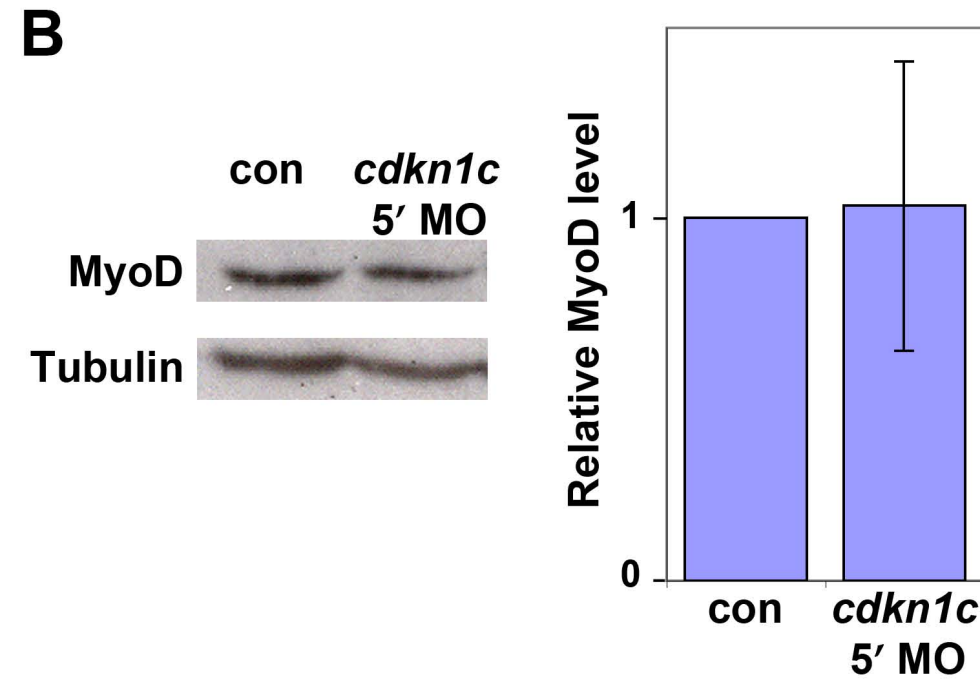



***cdkn1a***

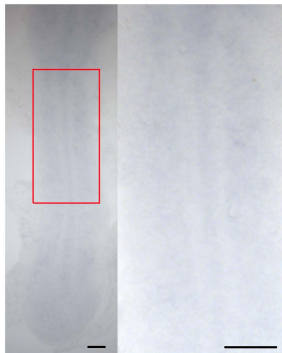

***cdkn1b***

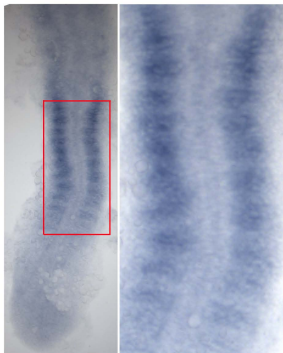

***cdkn1bl***

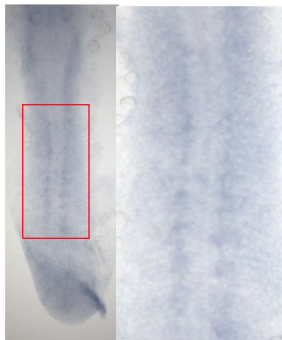

***cdkn1c***

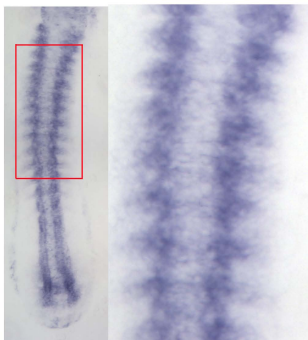

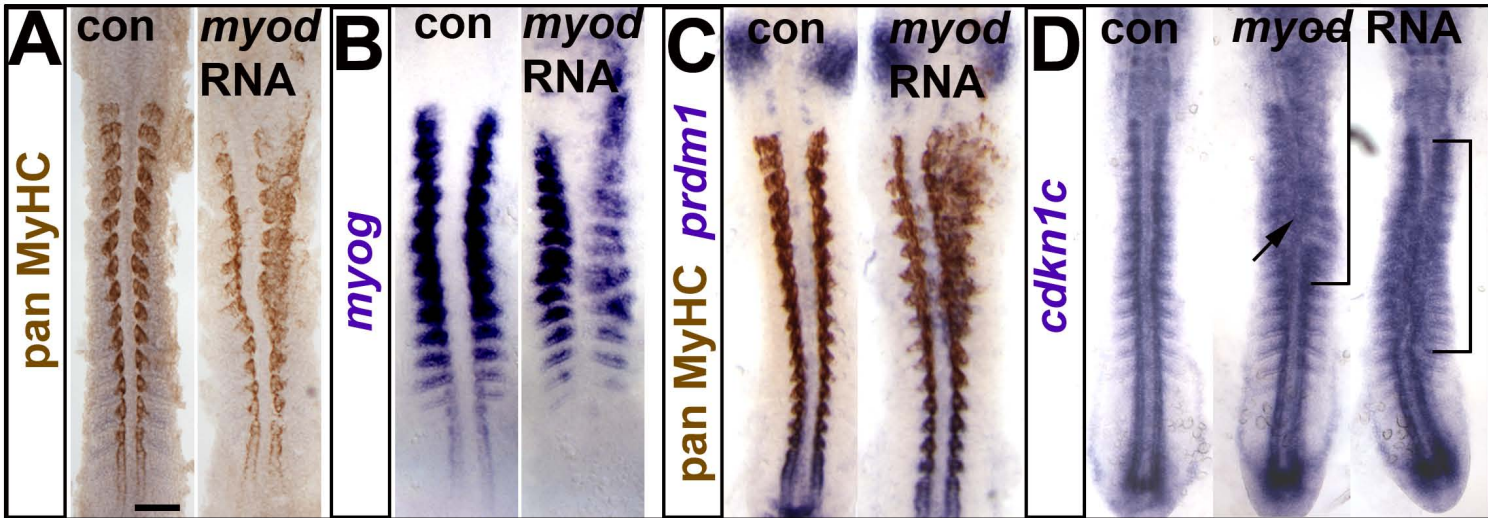

Supplement: NIHMS33736-supplement-01.pdf [file NIHMS33736-supplement-01.pdf]
